## HEAT DETECTION ATTENTIONS AND THE LH SURGE

### 1 **INTERPRETIVE SUMMARY. Heat detection attentions and LH surge. Adriaens.**

2 Both detection of heat and timely insemination are important factors in optimizing  
3 fertility management. The latter is dependent on ovulation time, which is preceded by the LH  
4 surge. In this study, the performance of 4 heat detection systems at predicting the LH surge was  
5 evaluated. Visual observation of standing heat correlates best with the LH surge, but is the least  
6 sensitive, while activity attentions are the least reliable. Using milk progesterone, one can  
7 reliably detect luteolysis, which in healthy cows is followed by the LH surge about 62 hours  
8 later.

### 10 **Linking heat attentions and the moment of LH surge in dairy cows – how close can we get?**

12 **Ines Adriaens<sup>\*,1</sup>, Wouter Saey<sup>s\*</sup>, Chris Lamberigts<sup>†</sup>, Mario Berth<sup>‡</sup>, Katleen Geerinckx<sup>§</sup>, Jo**  
13 **Leroy<sup>#</sup>, Bart De Ketelaere<sup>\*</sup>, Ben Aernouts<sup>\*,¶</sup>**

14 <sup>\*</sup> KU Leuven, Department of Biosystems, MeBioS

15 <sup>†</sup> KU Leuven, Department of Biosystems, Livestock Physiology

16 <sup>‡</sup> Department of Immunology, Algemeen Medisch Laboratorium, E. Vloorsstraat 9, 2020  
17 Antwerp, Belgium

18 <sup>§</sup> Province of Antwerp, Hooibeekhoeve, Hooibeeksedijk 1, 2440 Geel, Belgium

19 <sup>#</sup> University of Antwerp, Faculty of Pharmaceutical, Biomedical and Veterinary Sciences,  
20 Universiteitsplein 1, Wilrijk, Belgium.

21 <sup>¶</sup> KU Leuven, Department of Microbial and Molecular Systems, Cluster for Bioengineering  
22 Technology, Campus Geel, 2440 Geel, Belgium.

## HEAT DETECTION ATTENTIONS AND THE LH SURGE

- 23 <sup>1</sup> Corresponding author: [ines.adriaens@kuleuven.be](mailto:ines.adriaens@kuleuven.be) , Kasteelpark Arenberg 30, box 2456, 3001,  
24 Heverlee, Belgium, +32 16 32 88 73

## HEAT DETECTION ATTENTIONS AND THE LH SURGE

### 25 **ABSTRACT**

26 Both heat detection and timely insemination contribute to the optimization of fertility  
27 management on farm. In this study, 4 systems were compared for their ability to accurately  
28 detect heat and relate to the LH surge preceding ovulation in dairy cows. As the moment of LH  
29 surge has been reported to correlate strongly with time of ovulation, the potential to predict the  
30 optimal insemination can in this way be evaluated. The systems included were the traditional  
31 visual observation of heat, activity attentions and 2 progesterone-based methods. For the latter, it  
32 was also investigated whether the prediction of the LH surge could be improved by fitting a  
33 longitudinal model to the progesterone data. First, the systems were compared in terms of  
34 sensitivity and positive predictive value for heat detection. Then, the time interval between the  
35 attentions and the LH surge was investigated. The range on this interval was used as main  
36 criterion to evaluate the time-relation between the heat attention and the LH surge. The smaller  
37 this range, the better the correlation with the LH surge, and accordingly, ovulation. Heat  
38 attentions based on visual observations were noted from 4 hours before until 5 hours after the LH  
39 surge (range of 9 hours), indicating a high correlation. However, they also had the lowest  
40 sensitivity to detect heat (40%), making it less useful on-farm. Using activity-attentions proved  
41 more sensitive (80%), but was less accurate. Moreover, these attentions had the least accurate  
42 correlation with the moment of the LH surge and were observed from 39 hours before until 8  
43 hours after it (range of 47 hours). Attentions based on milk progesterone measurements through  
44 the detection of luteolysis preceding a follicular phase correctly identified all estrous periods.  
45 Alarms generated when the smoothed progesterone level crossed a 5 ng/mL threshold, were  
46 followed by the LH surge after 21.6 to 66.4 hours (range of 44.8 hours). The model-based

## HEAT DETECTION ATTENTIONS AND THE LH SURGE

47 approach performed slightly better with attentions generated 48.8 to 81.2 hours (range 32.9  
48 hours) before the LH surge.

49

50 **Key words;** preovulatory LH surge, heat detection systems, milk progesterone, visual estrus  
51 detection, cow activity

52

### INTRODUCTION

53 Both maximal detection of heat and timely insemination are important to improve on-  
54 farm fertility performance (Roelofs, 2005; Hockey et al., 2010). Traditionally, heat is detected  
55 through visual observation of external symptoms and insemination based on the detection of  
56 cows standing to be mounted. Here, the generally applied rule-of-thumb is to inseminate in the  
57 evening when a cow is showing standing heat in the morning and vice versa, which requires the  
58 farmer to observe his herd at least twice a day (Roelofs et al., 2015). However, visual detection is  
59 time-consuming and external heat symptoms are short-lived in high-producing dairy cows (Van  
60 Eerdenburg et al., 1996a; Lopez et al., 2004; Wiltbank et al., 2006; Løvendahl and Chagunda,  
61 2010). Therefore, automated systems are increasingly used for heat detection. For example,  
62 activity measurements are widely used to identify increased restlessness during estrus and were  
63 shown to be profitable (Rutten et al., 2014). The main advantages are that they do not consume  
64 any of the herdman's valuable time to make observations and within-cow comparisons can be  
65 made to generate an alert. However, behavior-based heat detection systems are still unable to  
66 identify silent heats, which occur in 10 to 55% of the estrous periods (Ranasinghe et al., 2010).  
67 The recent developments in on-line milk progesterone (**P4**) measurement systems allow to  
68 overcome this problem. P4 levels are widely used as a gold standard for estrus and can indicate  
69 the timing of luteolysis preceding ovulation. It was shown to be able to identify up to 99.2% of

## HEAT DETECTION ATTENTIONS AND THE LH SURGE

70 the estrous periods with a specificity of 93.7% (Friggens et al., 2008). However, luteolysis is not  
71 the ultimate trigger to ovulation despite it being a necessary condition for it, and as such, is not  
72 completely conclusive (Dobson et al., 2008).

73 Although it is essential to optimize the insemination window, only a limited number of  
74 studies investigated the link between heat attentions and ovulation (Van Eerdenburg et al., 2002;  
75 Roelofs et al., 2005a; Hockey et al., 2010). Moreover, these studies had variable success and  
76 their outcome depended strongly on the used gold standard for detection of ovulation. Three  
77 approaches have been proposed to verify if ovulation took place: (1) using insemination success  
78 and gestation which are strongly dependent on other factors, (2) using ultrasonography for the  
79 detection of the disappearance of a preovulatory follicle and (3) monitoring the preovulatory LH  
80 surge (Roelofs et al., 2004; Fisher et al., 2008). Monitoring the LH surge is useful because of the  
81 small window (21.5-27.5 hours) after this peak in which ovulation occurs (Roelofs et al., 2004).

82 Roelofs et al. (2005a) concluded that pedometer activity readings are the most accurate to  
83 predict ovulation as in their study, it occurred 22 to 39 hours (range 17 hours) and 12 to 35 hours  
84 (range 23 hours) after respectively the onset and the end of increased number of steps. In  
85 contrast, the intensity of visually detected estrous behavior did not influence ovulation time,  
86 which occurred between 18.5 and 48.5 hours after onset (range of 30 hours) and between 9.5 and  
87 33.5 hours (range of 24 hours) after the visually observed heat (Roelofs et al., 2005b). Until now,  
88 milk P4 dropping below a fixed threshold is shown to correlate poorly with actual timing of  
89 ovulation. The best results were obtained using a fixed threshold of 5 ng/ml, with ovulation  
90 occurring 54 to 98 hours later (range of 44 hours) (Roelofs et al., 2006). As mentioned by  
91 Friggens et al., (2008) and Adriaens et al., (2017), milk P4 measurements are subject to a large  
92 variability. Accordingly, the methodology used to monitor milk P4 might have a large impact on

## HEAT DETECTION ATTENTIONS AND THE LH SURGE

93 the accuracy of ovulation prediction (Friggens et al., 2008; von Leesen et al., 2013). To this end,  
94 different methodologies have already been developed and one of them is implemented in the on-  
95 line Herd Navigator<sup>TM</sup> (HN) system (Friggens and Chagunda, 2005; Friggens et al., 2008;  
96 Mazeris, 2010). This commercial instrument uses a smoothing filter to process the measured P4  
97 values and advises to inseminate 30 to 45 hours after the smoothed P4 level drops below a fixed  
98 threshold, depending on the parity. Unfortunately, in this way the exact moment of the P4 drop is  
99 strongly influenced by the sampling frequency and luteolysis rate, and subsequently, so is the  
100 recommended insemination window. To overcome this issue, a novel direct modelling approach  
101 was developed and described in Adriaens et al., (2017) and Adriaens et al. (*unpublished data*).

102 The objective of this study was to compare 4 different heat detection methods, different  
103 both in terms of sensitivity and positive predictive value (PPV), and in their accuracy to relate to  
104 the moment of the LH surge preceding ovulation. We hypothesized that the P4-based systems  
105 would outperform the behavior-based systems in terms of sensitivity and that prediction of the  
106 spontaneous occurring LH surge could be improved using a mathematical model describing P4  
107 during luteolysis.

108

109

## MATERIALS AND METHODS

### 110 *Animals, Feed and Housing*

111 The study was conducted in an experimental dairy farm housing 58 Holstein-Friesian  
112 cows in Flanders, Belgium in the spring of 2017. Approval of the ethical committee of KU  
113 Leuven was obtained under file ID P010/2017. Housing consisted of a freestall barn with slatted  
114 concrete floor. The cows were milked with an automated milking system (VMS, Delaval,  
115 Tumba, Sweden) and were fed with a mixed ration of grass and corn silage. Concentrate feeds

## HEAT DETECTION ATTENTIONS AND THE LH SURGE

116 were provided in the milking robot and through concentrate feeders. In the 2 months preceding  
117 the start of the study, all open cows which were more than 30 days post-partum were regularly  
118 checked for cyclicity. When it concerned cows with known fertility problems, a treatment was  
119 started to induce normal cyclicity. These animals were excluded from the trial if normal cycling  
120 did not start before the beginning of the trial. Pregnant cows and cows less than 30 days in  
121 lactation at the time of the trial were also excluded. As such, 24 animals were eligible for this  
122 study. Because open cows more than 150 days in lactation were allowed to be inseminated by the  
123 herdsman to avoid too much disruption in the normal fertility program of the test farm, in the  
124 first 10 days of the sampling period, 2 animals conceived successfully and were excluded,  
125 leaving 22 animals. These remaining cows were on average  $3.4 \pm 1.2$  years of age (mean $\pm$ SD),  
126 had parities between 1 and 4 and were between 30 and 293 days in lactation at the start of the  
127 study. For additional details the reader is referred to Adriaens et al. (*unpublished data*).

128

### 129 ***Milk Progesterone (P4)***

130 Over a period of 53 days, a mixed milk sample of each milking was taken automatically  
131 by the sampling unit (VMX, Delaval, Tumba, Sweden) following the procedure of the dairy herd  
132 improvement protocol prescribed by ICAR (ICAR International committee for animal recording,  
133 2014). The fresh milk samples were supplemented with 0.1%<sub>vol/vol</sub> preservative (Qlip N.V.,  
134 Leusden, the Netherlands) and stored at 3°C. Three times a week, they were brought to a  
135 certified lab (MCC-Vlaanderen, Lier), where 2 mL of each sample was frozen at -20°C. At the  
136 end of the trial, the P4 concentration was measured with a Ridgeway ELISA kit, for which more  
137 details are described in Adriaens et al., (2017). The P4 concentration of each sample was also  
138 determined automatically on-line by the HN system (Lattec, Delaval, Hillerød, Sweden). This  
139 device allowed us to monitor the P4 concentration during the study. As such, the moment at

## HEAT DETECTION ATTENTIONS AND THE LH SURGE

140 which the raw milk P4 started a consistent drop towards concentrations under 5 ng/mL, staying  
141 below it for a period of at least 24 hours is named the **HN-P4-drop**.

142

### 143 *Estrus Detection*

144 At first, this study compared different heat detection systems in terms of sensitivity and  
145 PPV. Hereto, a ‘reference heat period, **RHP**’, was defined, which starts with a HN-P4-drop  
146 followed by a period of low milk P4 (< 5 ng/mL) of minimum 5 and maximum 10 days in which  
147 a preovulatory follicle of at least 13 mm was detected as described below (Hopper, 2015). The  
148 sensitivity of a method was defined as the number of times an attention was given by the system  
149 during the RHP (true attentions) divided by the total number of RHP (true estrus). The PPV was  
150 the number of true attentions compared to the total number of attentions for that method.  
151 Sensitivity and PPV of the different heat detection systems were determined for the period  
152 between day 7 and the end of the study in which visual heat observations were performed.

153 Visual observations were done by an independent observer twice a day for 30 minutes  
154 according to the scoring system proposed by Van Eerdenburg et al., (1996) starting from day 7 of  
155 the trial, once in the late morning (11 AM) and once after evening feeding (6 PM). The observer  
156 was not aware of the P4 profiles nor of activity attentions. A cow was considered observed in  
157 estrus, and thus an ‘attention’ was raised when the sum of 2 successive observation scores  
158 exceeded 50. Because a cow standing to be mounted is considered conclusive for estrus, this was  
159 noted separately. If a single observation period resulted in a score above 50, the attention was set  
160 at that period. Otherwise, the time midway in-between the 2 successive observations was  
161 recorded. Observations of estrus (score > 50) not associated with a RHP were considered false  
162 alarms.



## HEAT DETECTION ATTENTIONS AND THE LH SURGE

163 Each cow was fitted with a commercial activity meter (ActoFIT, version 2015, Delaval,  
164 Tumba, Sweden) on the neckband. Increased activity was monitored automatically via the  
165 algorithm included in the DelPro Farm Manager software (Delaval, Tumba, Sweden). This  
166 algorithm generates an activity attention in 3 possible levels (+/++/+++), dependent on the actual  
167 restlessness of the cow compared to her normal behavior. Most estrous periods are associated  
168 with a gradually increasing activity level, returning successive '+', '++' and '+++' activity  
169 attentions. In this study, only the highest level of activity within the RHP was considered. Each  
170 attention not associated with a RHP was considered a false alarm.

171 P4-based attentions for heat detection were included in 2 different ways: (1) based on the  
172 current HN algorithm on the on-line P4 measurements and (2) based on a newly developed on-  
173 line monitoring system named **P4 Monitoring Algorithm using Synergistic Control (PMASC)**  
174 applied on ELISA measurements. For the first, HN raw measurements were smoothed according  
175 to the model described by Friggens and Chagunda (2005) using a Kalman filter. An attention was  
176 defined as the moment that the smoothed P4 value undercut a 5 ng/mL threshold. It should be  
177 noted that in our study, the measurement frequency was increased to 1 sample each milking, and  
178 all measurements were used to obtain the HN attentions. The second P4-based algorithm,  
179 PMASC, makes use of a mathematical model describing the different parts of the P4 profile  
180 (Adriaens et al., 2017) and a statistical process control chart to indicate luteolysis (Adriaens et al,  
181 *unpublished data*). An attention was raised when the system detected luteolysis followed  
182 immediately by a RHP within 24 hours. This is a complete novel approach to manage raw P4  
183 values and detect luteolysis as an indicator for the onset of estrus. The actual moment when  
184 luteolysis was detected was taken as the reference moment for calculations of PPV and  
185 sensitivity.

## HEAT DETECTION ATTENTIONS AND THE LH SURGE

186

### 187 *Serum LH*

188           One of the main difficulties when investigating the optimal insemination time is to have a  
189 good reference measurement for ovulation. Basically, the possibilities are limited to monitoring  
190 gestation after insemination, ultrasonography and detection of the LH surge. In contrast to  
191 ultrasonography, measuring LH is not dependent on immediate on-spot interpretation. As such, it  
192 is more feasible when collecting samples over a longer period of time and different observers can  
193 join forces without decreasing the performance of the reference method. Therefore, we used the  
194 preovulatory LH surge as a proxy for ovulation in this study. As the LH surge lasts only for 9-9.5  
195 hours on average (Roelofs et al., 2004; Fisher et al., 2008), high-frequent 2-hourly samplings  
196 around the expected ovulation time were needed. The availability of on-line P4 measurements  
197 allowed for optimizing sampling time without the need for external behavior-based estrus  
198 detection or the use of an estrous synchronization protocol.

199           Starting from day 28 of the trial, an expert veterinarian checked the ovaries of each cow  
200 for the presence of a preovulatory follicle 15 to 50 hours after the HN-P4-drop, using a  
201 transrectal ultrasound scanner (A6v, Sonoscape Medical Corp., Shenzhen, China). Next, 2 teams  
202 of 2 researchers took blood samples from the jugular vein each 2 hours starting 36 hours after the  
203 HN-P4-drop over a period of 72 hours, unless the cow showed post-estrous bleeding (in this  
204 case, sampling stopped). Disposable 20G needles were used, which were replaced for each  
205 sample taken to ensure minimal impact. The cows in the trial were trained to accustom them to  
206 human handling, and did not show symptoms of distress in the process. As much attention as  
207 possible was paid by the researchers to limit distress and it was assumed that taking the blood  
208 samples in this herd influenced the (stress-level of the) cows very little. The blood samples were

## HEAT DETECTION ATTENTIONS AND THE LH SURGE

209 allowed to clot at room temperature for 2 hours and were centrifuged at 2300 *g* to collect the  
210 serum. Next, three aliquots of each serum sample were stored at -20°C. Between 7 and 11 days  
211 after the HN-P4-drop, the ovaries of each cow were checked for the disappearance of the follicle  
212 and the presence of a *corpus luteum* (CL). At the end of the trial, LH concentration in the  
213 collected serum samples was measured with a commercially available bovine LH ELISA kit  
214 (Abnova, Taipei City, Taiwan) on a BEP2000 system (Siemens Healthcare Diagnostics,  
215 Marburg, Germany). This kit is based on a solid phase enzyme-linked immunosorbent assay,  
216 which utilizes a polyclonal anti-LH antibody for solid phase immobilization. The antibody-  
217 enzyme conjugate solution consists of a mouse monoclonal anti-LH antibody and horseradish  
218 peroxidase. The included standards contained 0, 1, 5, 10, 20 and 50 ng/mL LH. The within-run  
219 coefficient of variation was 6.3% (average LH 13.2 ng/mL) and 5.5% (average LH 45.2 ng/mL).  
220 The limit of quantification of this test was set at 3 ng/mL. All serum samples of the same cow  
221 were analyzed in the same analytical run. The LH surge was visually determined on a time  
222 versus LH concentration graph. The LH surge height was between 17 ng/mL and 49 ng/mL and  
223 was in all cases more than 8-fold the baseline LH concentration.

224

### 225 *Heat Attentions and the LH Surge*

226 The second part of the study consists of a comparison of the different heat detection  
227 attentions and the LH surge preceding ovulation. As LH was monitored only during the last 25  
228 days of the trial, only a selection of the RHP was used for the comparisons, further referred to as  
229 RHPs. In total, LH samples were taken during 24 RHP from 22 cows. Moreover, to obtain  
230 unbiased results, cows with severe health or fertility problems known to affect endocrinology,  
231 were excluded (Dobson et al., 2008; Walker et al., 2008) and are discussed in the next paragraph.

## HEAT DETECTION ATTENTIONS AND THE LH SURGE

232 A total of 15 RHP<sub>s</sub> (9 first parity, 6 multiparous cows, 158±53 days in lactation, body condition  
233 score 3.2±0.3, mean±SD) remained for the analysis.

234 To investigate the link between the heat detection attention and the LH surge, the time  
235 interval between the attention as described above and the moment of maximal LH concentration  
236 was calculated in hours, further referred to as the time interval (**TI**), and was calculated as time  
237 of LH peak minus time of attention. For visual observations, this was the interval from the  
238 moment the observation cumulative score exceeded 50 points to the LH surge (**TI<sub>VO</sub>**). Using the  
239 activity meter system, the moment of the highest level of activity within that period was used to  
240 calculate **TI<sub>ACT</sub>**. In the case of P4, both the HN attention (**TI<sub>HN</sub>**) and the moment of luteolysis  
241 determined with the PMASC system were included in the time interval (**TI<sub>L</sub>**). The latter allowed  
242 to evaluate if the LH surge could be predicted more accurately based on metrics obtained from  
243 the mathematical model fitted on the P4 data at the time of luteolysis. The different model-based  
244 indicators from which TI was calculated were (1) the inflection point of the decreasing Gompertz  
245 function describing the luteolysis (**TI<sub>IP</sub>**); (2) the intercept of the tangent line at the inflection  
246 point with the time-axis (**TI<sub>IC</sub>**); (3) the moment that the model surpassed a fixed threshold of 3,  
247 5, 7 or 10 ng/mL (**TI<sub>MOD\_x</sub>**); and (4) the moment the model undercut 85, 90 or 95% of the  
248 maximum P4 model concentration minus the baseline (**TI<sub>TB\_x</sub>**), with *x* representing the  
249 respective percentages and thresholds.

250

### 251 *LH Surge in Unhealthy Cows*

252 Despite the limited amount of data and the fact that monitoring unhealthy cows was not  
253 the main goal of this paper, it is interesting to take a closer look at the LH data for these animals  
254 and compare them with the healthy cows. The ‘unhealthy’ cows included 1 animal treated for

## HEAT DETECTION ATTENTIONS AND THE LH SURGE

255 milk fever, 1 being severely lame and 1 with endometritis, all undergoing spontaneous luteolysis.  
256 Additionally, 3 cows were treated for a luteal cyst with *Dinoprostum tromethamini*, triggering an  
257 immediate luteolytic reaction. Furthermore, 3 animals developed a follicular cyst or went in  
258 anestrus after a normal cycle and spontaneous luteolysis. This was detected with ultrasonography  
259 on day 7 – 11 after the HN-P4-drop.

260 The animals treated for luteal cysts are known to ovulate, but the moment of LH surge  
261 and ovulation is dependent on the stage of follicular growth at the moment of treatment.  
262 Accordingly, the relation between luteolysis, which happens right after treatment, and LH surge  
263 is not consistent in these cows. Therefore, collection of the serum samples was extended up to  
264 maximum 98 hours. The available LH results for these cows were compared with those of the  
265 healthy ones. Nevertheless, these cows were not included in the comparison between the  
266 attention and LH surge which was handled in the previous section, because luteolysis was  
267 induced here by exogenous PGF treatment.

268

## 269 RESULTS AND DISCUSSION

### 270 *Comparison of Heat Detection Methods*

271 In the following paragraphs, the performance of the systems in terms of sensitivity and  
272 PPV will be discussed and compared to the values obtained in other studies. This will place the  
273 results of the second part into perspective, where the link between heat attentions and the LH  
274 surge is investigated.

275 Between day 7 and 53 of the study, 42 RHP were detected in the 22 cows. These 42 RHP  
276 are used as the basis for comparison and comprise all cows, including these with health  
277 problems. The number of attentions per system, together with their sensitivity and PPV are

## HEAT DETECTION ATTENTIONS AND THE LH SURGE

278 summarized in Table 1. For the visual observations, it is indicated how many detections involved  
 279 a cow standing to be mounted. Similarly, the activity attentions are expressed according to their  
 280 maximum activity level of respectively ‘+’, ‘++’ or ‘+++’ for each period.

281 **Table 1.** Overview of the number of attentions, false alarms, sensitivity and PPV of the heat detection systems over the 46-day  
 282 monitoring period

|                               | Total # attentions | # false alarms | Sensitivity (RHP <sub>s</sub> <sup>2</sup> ) | PPV    |
|-------------------------------|--------------------|----------------|----------------------------------------------|--------|
| Visual observations           | 26 (6)             | 6              | 47.6% (40.0%)                                | 76.9%  |
| Standing behavior             | 13 (5)             | 0              | 20.9% (33.3%)                                | 100.0% |
| Activity system               | 55 (12)            | 21             | 80.9% (80.0%)                                | 61.8%  |
| +                             | 55 (12)            | 18             | 88.1% (80.0%)                                | 67.3%  |
| ++                            | 28 (10)            | 3              | 59.5% (66.6%)                                | 89.3%  |
| +++                           | 18 (5)             | 0              | 42.9% (33.3%)                                | 100.0% |
| P4-based systems <sup>1</sup> |                    |                |                                              |        |
| HN                            | 42                 | 0              | 100% (100%)                                  | 100.0% |
| PMASC                         | 35+7*              | 0              | 83+17%* (100%)                               | 100.0% |

283 <sup>1</sup>HN: Herd Navigator system; PMASC: Progesterone-based Monitoring Algorithm using Synergistic Control

284 <sup>2</sup>Between brackets: only considering the estrous periods included in the LH comparisons: RHP<sub>s</sub>

285 \*Due to a lack of data at the start of the trial, 7 low periods were not identified by the PMASC system. As the P4 pattern for these  
 286 is identical to the other 35 cases, and we did not want to discard all those data to avoid more reduction of the already small set,  
 287 we assumed that they would have been detected and reported them separately.

288  
 289 In this part of the study, cows with health or fertility problems were not excluded, because we  
 290 think it is up to the farmer to decide on the insemination of a cow. For example, cows treated for  
 291 a luteal cyst do ovulate, although they probably have a lower chance of conception. Typically,  
 292 the restlessness-based systems (visual observation, activity) will not raise an attention in  
 293 unhealthy cows. For example, severely lame animals or cows suffering from endometritis are not  
 294 expected to show external symptoms. Because the number of monitored heat attentions studied,  
 295 was rather limited, an in-depth comparison of heat detection systems is not feasible nor the  
 296 primary goal of this manuscript. For this purpose, we recommend the papers of e.g. Cavalieri et  
 297 al., (2003), Roelofs et al., (2010), Saint-Dizier and Chastant-Maillard, (2012), Rutten et al.,  
 298 (2013), Chanvallon et al., (2014), Michaelis et al., (2014), Firk et al., (2002) and (Roelofs et al.,  
 299 2015). To be able to make a fair comparison in the second part of this paper, the total number of

## HEAT DETECTION ATTENTIONS AND THE LH SURGE

300 attentions and sensitivity of the systems for the 15 RHP<sub>s</sub> included in the LH comparisons are  
301 shown in-between brackets in Table 1.

302 Visual observation of external estrous symptoms is the oldest and most widely used  
303 method for estrus detection. However, several different factors limit its reliability: housing,  
304 breed, age, production level, herd size, time of observation, other cows in estrus, etc. (Van  
305 Eerdenburg et al., 2002; Roelofs et al., 2005b, 2010; Løvendahl and Chagunda, 2010). In our  
306 study, a heat attention based on visual observation was generated 26 times for 14 cows, from  
307 which 20 were associated with a RHP (sensitivity 47.6%). Standing to be mounted was noted 13  
308 times (sensitivity 20.9%). Eight of the 22 cows never showed estrous symptoms during the  
309 observation periods (36.6%), and 20/42 estruses were silent (52.4%), which is comparable to  
310 results reported by other studies (Ranasinghe et al., 2010). No difference was seen between  
311 primiparous and multiparous cows ( $p$ -value = 0.469), nor was there a relation found with stage of  
312 lactation ( $p$ -value = 0.153). To verify that blood sampling did not negatively affect the estrus  
313 behavior, intensity and frequency of detection were compared for the period in which we  
314 sampled (day 28 to 53, 25 days) and the preceding period in which only milk samples for P4  
315 analysis were taken (day 7 to 27, 20 days). Neither the intensity of estrus (score,  $p$ -value =  
316 0.824), nor the frequency of detection (10 ‘true’ attentions per period) differed between the 2  
317 periods. Therefore, we can conclude that taking the blood samples did not influence the  
318 expression of external estrous symptoms. Visual observations twice a day was found to be the  
319 least reliable method for heat detection. For a thorough discussion of heat detection by visual  
320 observations, we refer to Van Eerdenburg et al., (1996).

321 When all 3 activity levels were considered, the activity-based system performed slightly  
322 better than the visual observations in terms of sensitivity, and was able to detect nearly 81% of

## HEAT DETECTION ATTENTIONS AND THE LH SURGE

323 the estrous periods. However, estrus detection solely based on the ‘+’ activity level is not  
324 reliable, as 18 of the 55 ‘+’ attentions (32.7%) were false alarms. These moderate increases in  
325 activity are most likely to be caused by dominance fighting or environment related factors. Using  
326 only the ‘++’ and ‘+++’ attentions drastically decreased the number of false alarms (5.4% and  
327 0% respectively), but the sensitivity decreased accordingly to 59.5% and 42.9%. The main  
328 advantage of activity meters over visual observations is the automated nature of the system  
329 which limits the time required for estrus detection by the farmer. However, insemination based  
330 solely on activity attentions is not recommended. The decision to inseminate should be based on  
331 additional evidence such as uterus tension or mucous vulvular discharge. Moreover, the current  
332 results only include the pre-selected cycling cows, and the false alarm rate for ‘++’ and ‘+++’  
333 attentions might increase when including ‘bulling’ animals with follicular cysts which did not  
334 respond to pre-trial treatments. Additionally, activity scoring does not identify silent ovulations  
335 in which the cow does not show the estrus-associated restlessness (36% in our study).

336         The comparison period started 7 days after the start of the trial. The PMASC system in its  
337 current form needs to start from a period of low P4, as it is designed to start in the postpartum  
338 anestrous period. In this way, luteolysis not preceded by the 18-21 day training period, could not  
339 be detected by the system. This was the case for 7 out of the 42 RHP in the trial. Accordingly, if  
340 these 7 cases would be included in the sensitivity calculation for PMASC, the sensitivity would  
341 drop to 83%. However, as these would most likely have been detected if a larger reference  
342 sampling period for training before these events had been available, this is an underestimation of  
343 PMASC’s performance. Therefore, these 7 RHP were excluded from the analysis for PMASC,  
344 resulting in a sensitivity of 100%. We marked the calculations for these separately with a “\*” in  
345 Table 1. In a large study conducted by Friggens et al., (2008), a sensitivity of 93.3% to 99.2%



## HEAT DETECTION ATTENTIONS AND THE LH SURGE

346 was reached, using the HN system for milk P4 measurements in combination with the model  
347 described by Friggens and Chagunda (2005). It should be noted that the obtained sensitivity  
348 results are influenced by the way ‘estrus’ is defined.

349 The value of P4-based systems only indicating luteolysis might be over-estimated in  
350 terms of sensitivity as long as there is no better standard for ovulation. Basically, the absence of  
351 P4 is a necessary condition for the secretion of the GnRH impulse, which stimulates the pituitary  
352 gland to produce the preovulatory LH surge. The complete hormone mechanism for ovulation is  
353 complex, and depends on a cascade of inhibition and stimulating hormones, all influenced by  
354 several physiological factors (Hopper, 2015). For instance, decreasing body condition score and  
355 negative energy balance result in reduced oocyte quality and inadequate CL function (Leroy et  
356 al., 2008). Future research will determine when it is recommended to inseminate after a detected  
357 luteolysis, and which factors (such as BCS, diseases, insufficient uterus tonus, ...) should be  
358 taken into account.

359 In the following section, a comparison is given of the heat detection attentions and their  
360 correlation with the LH surge preceding ovulation. As such, the timing of optimal insemination  
361 based on these attentions could be evaluated.

362

### 363 *Predicting the LH Surge*

364 The second part of this study focused on the time interval (TI) between heat detection  
365 attentions and the LH surge ( $TI_{VO}$ ,  $TI_{ACT}$ ,  $TI_{HN}$ ,  $TI_{PMASC}$ ).

366 The baseline concentration of serum LH was on average  $1.46 \pm 0.84$  ng/mL and was in  
367 393 out of the 491 measurements (80%) below the limit of quantification of the assay (i.e.  $< 3$   
368 ng/mL). The LH surge ( $36.3 \pm 11.3$  ng/mL) (mean  $\pm$  SD) developed and faded for all cows within 8

## HEAT DETECTION ATTENTIONS AND THE LH SURGE

369 hours (= 4 measurements). An overview of the LH data and the ELISA P4 profiles, centered  
370 around the LH surge is shown in Figure 1. A clear peak can be observed for each of the included  
371 cows despite the afore-mentioned variability in serum LH concentrations measured with ELISA.  
372 The P4 profiles also show a large variability, both before and after the LH surge, but all cows  
373 had an active CL producing P4 concentrations of more than 5 ng/mL within 7 days after the LH  
374 surge, which is an additional indicator that these cows had ovulated.

375 In Figure 2, the TI in hours from the attention to the LH surge is plotted for each of the  
376 RHP<sub>s</sub> for which an attention was given, together with the average (thick red line). A summary of  
377 these results is also given in Table 2. The upper black dots show the data for the first parity, the  
378 lower grey dots for parity 2 and higher.

379 In 9 of the 15 RHP<sub>s</sub>, no attention based on visual observation of heat symptoms was  
380 generated, and in only 5 cases standing heat was noted. Attentions based on visual observation of  
381 heat have a very strong correlation with the LH surge (range of 9 hours, average TI of -1.5 hours,  
382 as the LH surge preceded the attention by on average 1.5 hours). So, visual observation of heat is  
383 a very conclusive way of determining the LH surge, despite it being less sensitive. Both literature  
384 and common practice advise to inseminate cows 12 hours after visual detection and thus,  
385 according to the study of Roelofs and colleagues, 12 to 14 hours before ovulation (Roelofs et al.,  
386 2004). As the LH surge precedes ovulation with 24 to 26 hours, our study confirms their results.  
387 The same applies for the average time of  $26.4 \pm 5.2$  hours from standing heat to ovulation  
388 (Roelofs et al., 2004), which also agrees with our findings. There was no difference between the  
389 parities.

390 Although not included in these results, 2 more cows showed standing heat during the  
391 night. These cows didn't show any symptom of estrus during the periods in which they were

## HEAT DETECTION ATTENTIONS AND THE LH SURGE

392 observed according to the aforementioned protocol (during the day). The LH surge of these cows  
 393 was 2 and 0 hours apart from the observation, which is an additional confirmation of the higher  
 394 mentioned agreement between LH surge and cows standing to be mounted.

395 **Table 2.** Summary of the time intervals (TI<sub>x</sub>) for the different heat detection systems

|                              | N  | Sensitivity | TI <sub>x</sub> |         |       |       |      |
|------------------------------|----|-------------|-----------------|---------|-------|-------|------|
|                              |    |             | Minimum         | Maximum | Range | Mean  | SD   |
| Visual observation           | 6  | 40%         | -5.0            | 4.0     | 9.0   | -1.5  | 3.9  |
| Parity 1                     | 2  |             | -4.0            | 3.0     | 7.0   | -0.5  | 5.0  |
| Parity >2                    | 4  |             | -5.0            | 4.0     | 9.0   | -2.00 | 4.1  |
| Activity attentions          | 12 | 80%         | -8.0            | 39.0    | 47.0  | 9.42  | 16.1 |
| Parity 1                     | 7  |             | -8.0            | 26.0    | 34.0  | 2.29  | 11.2 |
| Parity >2                    | 5  |             | -1.0            | 39.0    | 40.0  | 19.4  | 17.7 |
| Herd Navigator               | 15 | 100%        | 21.6            | 66.4    | 44.8  | 46.8  | 11.4 |
| Parity 1                     | 9  |             | 21.6            | 62.2    | 40.6  | 44.1  | 11.7 |
| Parity >2                    | 6  |             | 38.6            | 66.4    | 27.8  | 50.9  | 10.6 |
| PMASC - Luteolysis           | 15 | 100%        | 45.9            | 81.6    | 35.7  | 62.0  | 12.2 |
| Parity 1                     | 9  |             | 45.9            | 79.8    | 33.9  | 61.2  | 12.7 |
| Parity >2                    | 6  |             | 50.0            | 81.6    | 31.6  | 63.2  | 12.4 |
| PMASC - IP <sup>1</sup>      |    |             | 52.0            | 87.2    | 35.2  | 73.4  | 11.1 |
| PMASC - IC <sup>1</sup>      |    |             | 38.7            | 79.3    | 40.6  | 55.7  | 12.4 |
| PMASC - TB_85 <sup>1</sup>   |    |             | 41.8            | 78.4    | 34.6  | 56.4  | 11.2 |
| PMASC - TB_90 <sup>1</sup>   |    |             | 21.6            | 75.5    | 43.9  | 46.2  | 15.5 |
| PMASC - TB_95 <sup>1</sup>   |    |             | 4.9             | 71.3    | 66.4  | 43.0  | 17.2 |
| PMASC - TMOD_10 <sup>1</sup> |    |             | 48.3            | 81.2    | 32.9  | 66.6  | 11.1 |
| PMASC - TMOD_7 <sup>1</sup>  |    |             | 45.6            | 80.3    | 34.7  | 61.6  | 11.4 |
| PMASC - TMOD_5 <sup>1</sup>  |    |             | 35.1            | 79.3    | 44.2  | 56.8  | 12.6 |
| PMASC - TMOD_3 <sup>1</sup>  |    |             | 13.9            | 77.4    | 63.5  | 47.8  | 18.1 |

396 <sup>1</sup>PMASC – Progesterone-based monitoring algorithm using Synergistic Control; IP = inflection point, IC = intercept  
 397 tangent line at IP and t-axis; TB\_X: threshold based on model passing X% of the maximal + baseline P4 value;  
 398 TMOD\_X: model passing a threshold of X ng/mL  
 399

400 Three RHP<sub>s</sub> didn't have an activity attention and from the other twelve, two had only a  
 401 '+' attention, which was reported in part 1 to be very unreliable for heat detection. Furthermore,  
 402 activity attentions generated by commercialized activity sensors were the least reliable system to  
 403 relate to the LH surge. Twelve of the 15 RHP<sub>s</sub> had at least a '+' attention, but the range from  
 404 attention to LH surge varied from 39 hours before the LH surge to 8 hours after it. When  
 405 addressing the different parities, it seemed that the RHP<sub>s</sub> of cows in the first parity cows had a  
 406 more consistent TI from attention to the LH surge than the multiparous cows. The single outlier  
 407 of the first parity animals is a '+' attention, which is rather unreliable for heat. The 2<sup>nd</sup> and higher

## HEAT DETECTION ATTENTIONS AND THE LH SURGE

408 parity cows clearly show a higher variability (range TI = 40 hours). It is possible that these  
409 results improve when using different data processing algorithms. For example, Roelofs and  
410 colleagues reported decent accuracy in predicting ovulation using activity measurements. They  
411 reported that ovulation occurred  $29.3 \pm 3.9$  hours after the onset of an increased number of steps  
412 (TI between 22-39 hours) and  $19.4 \pm 4.4$  hours after the end of the increased number of steps (TI  
413 between 12-35 hours) (Roelofs et al., 2005a). However, evaluating alternative data processing  
414 algorithms for raw activity data was outside the scope of this study.

415         The P4-based systems generated attentions for all the RHP<sub>s</sub>. The HN system gives an  
416 attention when the processed P4 data undercuts a fixed 5 ng/mL threshold on the test farm. In our  
417 study, this attention preceded the LH surge by 21.6 to 66.4 hours (range 45 hours), with almost  
418 no difference between first and higher parity cows. It should be noted that these attentions were  
419 based on a maximum sampling frequency of once per milking, which might be reduced in a real  
420 farm setting. It is expected, but not proven, that the range of 45 hours between maximum and  
421 minimum TI from HN attention to LH surge increases when the system runs in a normal setting,  
422 due to an additional time lag caused by the smoothing algorithm when less samples are taken.  
423 This time-lag is an inherent characteristic of the Kalman filter. The HN algorithm at the test farm  
424 advised to inseminate the cows 30-35 (first parity) to 40-45 (multiparous) hours after the HN  
425 attention. As such, in 14 of the 15 RHP<sub>s</sub> the cow was inseminated in a window between 24  
426 before and 8 hours after LH surge, depending on when the inseminator was available. From  
427 these, 6 conceived successfully while 2 others might have been pregnant, but encountered a P4  
428 fall between day 40 and 50 after insemination. Two cows were inseminated too early (40 and 24  
429 hours before LH surge), and two cows had a rather low P4 concentration during the luteal phase  
430 after insemination, possibly insufficient to support pregnancy (Hopper, 2015; Bruinjé et al.,

## HEAT DETECTION ATTENTIONS AND THE LH SURGE

431 2017). One cow was culled before pregnancy control, due to udder health problems. The last one  
432 had a timely insemination and no abnormalities were noted, but did not conceive for unknown  
433 reasons.

434 The average TI from luteolysis to the LH surge detected with the PMASC system in this  
435 study was 62 hours, with a minimum of 46 and a maximum of 82 hours. The resulting range is  
436 thus 36 hours, and did not differ between first and higher parity cows. However, this range  
437 depends on the sampling frequency, as does the HN attention. Therefore, it would be better to  
438 have an indicator which is equally predictive, but less dependent on the sampling.

439 One of the research questions of this study was whether the estimation of the LH surge  
440 could be improved by developing model-dependent rather than data-dependent guidelines  
441 through the PMASC system. In that way, it is possible to optimize the insemination advice by  
442 (partially) decoupling the generation of the attentions from the sampling frequency and luteolysis  
443 rate, which makes the monitoring system more robust. In Figure 3, the correlation between the  
444 model-based indicators and the LH surge is shown for the 15 RHP<sub>S</sub>. Each dot represents the TI  
445 from the model-based indicator to the moment of the LH surge for each individual RHP<sub>S</sub>. These  
446 results are also summarized in Table 2.

447 As described above, the moment of luteolysis 'L' detected by the PMASC system has a  
448 good correlation with the LH surge and TI<sub>L</sub> occurred in a range of 36 hours. The other lines show  
449 that both IP, Tb<sub>85</sub>, Tmod<sub>10</sub> and Tmod<sub>7</sub> have perform similarly (range TI<sub>X</sub> of 33 – 35 hours). With  
450 maximal sampling frequency, the IP does not diverge more than a few hours from the moment of  
451 detected luteolysis, explaining their correlation. Healthy cows typically have a luteal P4  
452 concentration between 20 and 30 ng/mL and a follicular concentration of approximately 2.5  
453 ng/mL. Accordingly, Tb<sub>85</sub> represents the moment that the model goes below  $2.5+0.15*(20-2.5) =$

## HEAT DETECTION ATTENTIONS AND THE LH SURGE

454 5.1 to  $2.5+0.15*(30-2.5)= 6.6$  ng/mL. Using this  $Tb_{85}$  indicator, and thereby considering the  
455 absolute P4 concentration, provided a better result than when a fixed threshold of 5 ng/mL was  
456 used on the model ( $TI_{T_{MOD5}}$ ). However, when a fixed threshold of 10 or 7 on the model was used  
457 (respectively  $TI_{T_{MOD10}}$  and  $TI_{T_{MOD7}}$ ), an even smaller range of 33 and 35 hours was noted. These  
458 results demonstrate that the actual moment when luteolysis starts, is more indicative for the LH  
459 surge than the P4 being fully cleared from the cow's bloodstream. The obtained values for  $TI_X$   
460 should be interpreted with any precaution as the number of studied cycles is limited.  
461 Nevertheless, this study provides an objective indication of the value of the different heat  
462 detection attentions in predicting the LH surge, allowing to compare the different systems. In this  
463 way, these results can possibly be extrapolated to small and medium size farms not using  
464 synchronization protocols for fertility optimization. Possible advantages of model-based  
465 indicators are that they (1) are calculated for each profile, providing flexibility to account for  
466 differences in shapes and absolute levels; (2) are disconnected from the exact moment of  
467 sampling in contrast to using the exact moment of luteolysis; (3) have the possibility to further  
468 optimize sampling rate and model parameters, e.g. by fixing the slope-determining parameters to  
469 physiologically relevant ranges when less frequent samples are available (Meier et al., 2009).  
470 The latter 3 topics are important subjects for further research.

471

### 472 *LH Surge in Unhealthy Cows*

473 In this paragraph, we contrast the unhealthy cases to the normal ones described above. It  
474 was hypothesized that unhealthy cows have a larger variation in their moment of LH surge, or  
475 even would not have one at all (Dobson et al., 2008; Morris et al., 2009, 2011). This was  
476 confirmed in our study. For example, the 3 cows treated for a luteal cyst all showed a clear LH

## HEAT DETECTION ATTENTIONS AND THE LH SURGE

477 surge within the sampling period. Of those 3, 1 had the LH surge 63 hours after luteolysis which  
478 is comparable to the normal cows. The LH surges of the 2 other cows were 45 and 111 hours  
479 after luteolysis. For 1 cow, this is far above average, while the other is rather early compared to  
480 the normal ones. This can probably be explained by the difference in follicular growth stage of  
481 the current follicular wave at the moment of treatment. For the 3 cows treated for other health  
482 problems around the period of luteolysis (severe lameness, endometritis, milk fever), neither had  
483 an LH surge within the sampled time-period. Unfortunately, it was not possible to check when  
484 their P4 concentration increased again and ovulation had taken place with certainty: for 1 cow  
485 ovarian activity was boosted using GnRH and PGF<sub>2α</sub> agonists, the second was culled and did not  
486 rise to luteal levels before and the third was treated for a follicular cyst.

487

488

### CONCLUSIONS

489 Monitoring P4 allows to identify luteolysis and outperforms classical heat detection  
490 systems based on external estrous symptoms in terms of sensitivity and PPV. However,  
491 insemination success also depends on correct identification of the moment of ovulation. In this  
492 study, we investigated the time interval between heat detection attentions and the moment of the  
493 LH surge, which has been reported to occur about 26 hours before ovulation, using different heat  
494 detection methods. Although an almost perfect correlation was noted between the moment of the  
495 LH surge and the heat attention based on visual observations, its use is strictly limited by the  
496 time-consuming nature and low sensitivity of this method. The heat detection system based on  
497 increased activity performed better in terms of sensitivity, but was unable to reliably estimate the  
498 moment of the LH surge. In this study, activity attentions were noted from 39 hours before until  
499 8 hours after the LH surge (range of 47 hours). P4 based system indicate luteolysis before

## HEAT DETECTION ATTENTIONS AND THE LH SURGE

500 ovulation, and the P4 based systems are very sensitive. Attentions generated by the HN system  
501 were followed by an LH surge after 21.6 – 66.4 (range of 44.8) hours. Accordingly, the  
502 correlation with the moment of LH surge was slightly better than for activity attentions. A new  
503 methodology using direct modelling of P4 performs as good in predicting luteolysis, generating  
504 attentions 48.3 to 81.2 (range 32.9) hours before the LH surge. This model-based approach for  
505 milk P4-based heat detection has the potential to be more robust when less samples are available,  
506 but further research is required to confirm this. Additionally, further research is also  
507 recommended to identify the factors influencing the LH surge, and the time delay between  
508 luteolysis and ovulation.

509

510

### ACKNOWLEDGEMENTS

511 This work was supported by the Institute for the Promotion of Innovation through  
512 Science and Technology in Flanders, Belgium (IWT) [IWT-LA project 110770]. Ines Adriaens  
513 and Ben Aernouts are supported by the Fund for Scientific Research (FWO) Flanders,  
514 respectively grant number 11ZG916N and 12K3916N. We thank Anne Van Gemert for  
515 performing the visual observations of heat symptoms, Bea Bax for the ultrasonic scanning of the  
516 ovaries and interpretation of the images. We thank Shahbaz Bashir and Mathilde Tinel for their  
517 assistance during the blood sampling. Lattec supported this study by supplying additional  
518 progesterone sticks and modifying the HN software to take samples at every milking event.

519

520

521

### REFERENCES

522 Adriaens, I., T. Huybrechts, K. Geerinckx, D. Daems, J. Lammertyn, B. De Ketelaere, W. Saeys,  
523 and B. Aernouts. 2017. Mathematical characterization of the milk progesterone profile as a



## HEAT DETECTION ATTENTIONS AND THE LH SURGE

- 524 leg up to individualised monitoring of reproduction status in dairy cows. *Theriogenology*  
525 103:44–51.
- 526 Bruinjé, T.C., M. Gobikrushanth, M.G. Colazo, and D.J. Ambrose. 2017. Dynamics of pre- and  
527 post-insemination progesterone profiles and insemination outcomes determined by an in-  
528 line milk analysis system in primiparous and multiparous Canadian Holstein cows.  
529 *Theriogenology* 102:147–153.
- 530 Cavalieri, J., V.E. Eagles, M. Ryan, and K.L. Macmillan. 2003. Comparison of four methods for  
531 detection of oestrus in dairy cows with resynchronised oestrous cycles. *Aust. Vet. J.*  
532 81:422–425. doi:10.1111/j.1751-0813.2003.tb11553.x.
- 533 Chanvallon, A., S. Coyral-Castel, J. Gatien, J.-M. Lamy, D. Ribaud, C. Allain, P. Clément, and  
534 P. Salvetti. 2014. Comparison of three devices for the automated detection of estrus in dairy  
535 cows.. *Theriogenology* 82:734–41.
- 536 Dobson, H., S. Walker, M. Morris, J. Routly, and R. Smith. 2008. Why is it getting more  
537 difficult to successfully artificially inseminate dairy cows?. *Animal* 2:1104–1111.  
538 doi:10.1017/S175173110800236X.Why.
- 539 Van Eerdenburg, F.J.C.M., D. Karthaus, M.A.M. Taverne, I. Merics, and O. Szenci. 2002. The  
540 relationship between estrous behavioral score and time of ovulation in dairy Cattle. *J. Dairy*  
541 *Sci.* 85:1150–1156. doi:10.3168/jds.S0022-0302(02)74177-5.
- 542 Van Eerdenburg, F.J.C.M., H.S.H. Loeffler, and J.H. van Vliet. 1996a. Detection of oestrus in  
543 dairy cows: A new approach to an old problem. *Vet. Q.* 18:52–54.
- 544 Van Eerdenburg, F.J.C.M., H.S.H. Loeffler, and J.H. Van Vliet. 1996b. Detection of oestrus in  
545 dairy cows□: A new approach to an old problem. *Vet. Q.* 18:52–54.  
546 doi:10.1080/01652176.1996.9694615.

## HEAT DETECTION ATTENTIONS AND THE LH SURGE

- 547 Firk, R., E. Stamer, W. Junge, and J. Krieter. 2002. Automation of oestrus detection in dairy  
548 cows: a review. *Livest. Prod. Sci.* 75:219–232.
- 549 Fisher, A.D., R. Morton, J.M.A. Dempsey, J.M. Henshall, and J.R. Hill. 2008. Evaluation of a  
550 new approach for the estimation of the time of the LH surge in dairy cows using vaginal  
551 temperature and electrodeless conductivity measurements. *Theriogenology* 70:1065–1074.  
552 doi:10.1016/j.theriogenology.2008.06.023.
- 553 Friggens, N.C., M. Bjerring, C. Ridder, S. Højsgaard, and T. Larsen. 2008. Improved Detection  
554 of Reproductive Status in Dairy Cows Using Milk Progesterone Measurements. *Reprod.*  
555 *Domest. Anim.* 43:113–121.
- 556 Friggens, N.C., and M.G.G. Chagunda. 2005. Prediction of the reproductive status of cattle on  
557 the basis of milk progesterone measures: model description.. *Theriogenology* 64:155–90.
- 558 Hockey, C., J. Morton, S. Norman, and M. McGowa. 2010. Improved prediction of ovulation  
559 time may increase pregnancy rates to artificial insemination in lactating dairy cattle.  
560 *Reprod. Domest. Anim.* 45:239–248. doi:10.1111/j.1439-0531.2009.01548.x.
- 561 Hopper, R.M. 2015. *Bovine Reproduction*. 1st Ed. John Wiley & Sons, Inc., Iowa.
- 562 ICAR International committee for animal recording. 2014. *ICAR Recording Guidelines*. *Int.*  
563 *Agreem. Rec. Pract.* 619.
- 564 von Leesen, R., J. Tetens, W. Junge, and G. Thaller. 2013. Mathematical approaches to detect  
565 low concentrations in progesterone profiles. *Animal* 7:2008–2015.  
566 doi:10.1017/S1751731113001754.
- 567 Leroy, J.L.M.R., G. Opsomer, A. Van Soom, I.G.F. Goovaerts, and P.E.J. Bols. 2008. Reduced  
568 fertility in high-yielding dairy cows: Are the oocyte and embryo in danger? Part I. The  
569 importance of negative energy balance and altered corpus luteum function to the reduction

## HEAT DETECTION ATTENTIONS AND THE LH SURGE

- 570 of oocyte and embryo quality in high-yielding dairy cows. *Reprod. Domest. Anim.* 43:612–  
571 622.
- 572 Lopez, H., L.D. Satter, and M.C. Wiltbank. 2004. Relationship between level of milk production  
573 and estrous behavior of lactating dairy cows. *Anim. Reprod. Sci.* 81:209–223.  
574 doi:10.1016/j.anireprosci.2003.10.009.
- 575 Løvendahl, P., and M.G.G. Chagunda. 2010. On the use of physical activity monitoring for  
576 estrus detection in dairy cows. *J. Dairy Sci.* 93:249–259. doi:10.3168/jds.2008-1721.
- 577 Mazeris, F. 2010. DeLaval Herd Navigator: Proactive Herd Management. Pages 26–27 in  
578 Proceedings of First North American Conference on Precision Dairy Management.
- 579 Meier, S., J. Roche, E. Kolver, G. Verkerk, and R. Boston. 2009. Comparing subpopulations of  
580 plasma progesterone using cluster analyses.. *J. Dairy Sci.* 92:1460–1468.
- 581 Michaelis, I., O. Burfeind, and W. Heuwieser. 2014. Evaluation of oestrous detection in dairy  
582 cattle comparing an automated activity monitoring system to visual observation. *Reprod.*  
583 *Domest. Anim.* 49:621–628. doi:10.1111/rda.12337.
- 584 Morris, M.J., K. Kaneko, S.L. Walker, D.N. Jones, J.E. Routly, R.F. Smith, and H. Dobson.  
585 2011. Influence of lameness on follicular growth, ovulation, reproductive hormone  
586 concentrations and estrus behavior in dairy cows. *Theriogenology* 76:658–668.  
587 doi:10.1016/j.theriogenology.2011.03.019.
- 588 Morris, M.J., S.L. Walker, D.N. Jones, J.E. Routly, R.F. Smith, and H. Dobson. 2009. Influence  
589 of somatic cell count, body condition and lameness on follicular growth and ovulation in  
590 dairy cows. *Theriogenology* 71:801–806. doi:10.1016/j.theriogenology.2008.10.001.
- 591 Ranasinghe, R.M.S.B.K., T. Nakao, K. Yamada, and K. Koike. 2010. Silent ovulation, based on  
592 walking activity and milk progesterone concentrations, in Holstein cows housed in a free-

## HEAT DETECTION ATTENTIONS AND THE LH SURGE

- 593 stall barn. *Theriogenology* 73:942–949.
- 594 Roelofs, J., F. López-Gatius, R.H.F. Hunter, F.J.C.M. van Eerdenburg, and C. Hanzen. 2010.
- 595 When is a cow in estrus? Clinical and practical aspects. *Theriogenology* 74:327–344.
- 596 Roelofs, J.B. 2005. When to inseminate the cow? Insemination, ovulation and fertilization in
- 597 dairy cattle.
- 598 Roelofs, J.B., E.G. Bouwman, S.J. Dieleman, F.J.C.M. Van Eerdenburg, L.M.T.E. Kaal-
- 599 Lansbergen, N.M. Soede, and B. Kemp. 2004. Influence of repeated rectal ultrasound
- 600 examinations on hormone profiles and behaviour around oestrus and ovulation in dairy
- 601 cattle. *Theriogenology* 62:1337–1352. doi:10.1016/j.theriogenology.2004.02.002.
- 602 Roelofs, J.B., F.J.C.M. Van Eerdenburg, W. Hazeleger, N.M. Soede, and B. Kemp. 2006.
- 603 Relationship between progesterone concentrations in milk and blood and time of ovulation
- 604 in dairy cattle. *Anim. Reprod. Sci.* 91:337–343.
- 605 Roelofs, J.B., F.J.C.M. Van Eerdenburg, N.M. Soede, and B. Kemp. 2005a. Pedometer readings
- 606 for estrous detection and as predictor for time of ovulation in dairy cattle. *Theriogenology*
- 607 64:1690–1703. doi:10.1016/j.theriogenology.2005.04.004.
- 608 Roelofs, J.B., F.J.C.M. Van Eerdenburg, N.M. Soede, and B. Kemp. 2005b. Various behavioral
- 609 signs of estrous and their relationship with time of ovulation in dairy cattle. *Theriogenology*
- 610 63:1366–1377.
- 611 Roelofs, J.B., E. van Erp-van der Kooij, and E. van Erp-van der Kooij. 2015. Estrus detection
- 612 tools and their applicability in cattle: recent and perspectival situation. *Anim. Reprod.*
- 613 12:498–504.
- 614 Rutten, C.J., W. Steeneveld, C. Inchaisri, and H. Hogeveen. 2014. An ex ante analysis on the use
- 615 of activity meters for automated estrus detection: To invest or not to invest?. *J. Dairy Sci.*

## HEAT DETECTION ATTENTIONS AND THE LH SURGE

- 616 97:6869–6887.
- 617 Rutten, C.J., a G.J. Velthuis, W. Steeneveld, and H. Hogeveen. 2013. Invited review: sensors to  
618 support health management on dairy farms.. *J. Dairy Sci.* 96:1928–1952.
- 619 Saint-Dizier, M., and S. Chastant-Maillard. 2012. Towards an automated detection of oestrus in  
620 dairy cattle. *Reprod. Domest. Anim.* 47:1056–1061.
- 621 Walker, S.L., R.F. Smith, D.N. Jones, J.E. Routly, and H. Dobson. 2008. Chronic stress,  
622 hormone profiles and estrus intensity in dairy cattle.. *Horm. Behav.* 53:493–501.
- 623 Wiltbank, M., H. Lopez, R. Sartori, S. Sangsritavong, and A. Gümen. 2006. Changes in  
624 reproductive physiology of lactating dairy cows due to elevated steroid metabolism.  
625 *Theriogenology* 65:17–29. doi:10.1016/j.theriogenology.2005.10.003.
- 626
- 627

## HEAT DETECTION ATTENTIONS AND THE LH SURGE

628 Figure 1. Overview of the P4 profiles centered around the LH surge for the 15 cows selected for  
629 this study. A large variability in the P4 profiles is noted both before and after the LH surge, but  
630 all cows had an active *corpus luteum*, reflected in a P4 concentration higher than 5 ng/mL within  
631 7 days after the LH surge.

632  
633 Figure 2. Visual observations (VO) have the smallest range (9 hours) in time interval (TI) from  
634 attention to the moment of the LH surge, but are very insensitive (6 out of 15 detected). Activity  
635 attentions have the largest range (47 hours) and thus perform the poorest in correlating with the  
636 LH surge. The progesterone-based systems (Herd Navigator, HN and Progesterone based  
637 Monitoring Algorithm using Synergistic control, PMASC) show ranges of 45 and 36 hours.  
638 Further details are given in Table 2. Black circles indicate first parity cows, grey circles parity 2  
639 and higher.

640  
641 Figure 3. Representation of the link between model-based indicators and the LH surge. Both TI  
642 ranges of the inflection point ( $TI_{IP}$ ), the moment the model reaches 85% of the maximum +  
643 baseline model value ( $TI_{TB85}$ ), and the fixed thresholds on the model ( $TI_{T_{MOD10}}$  and  $TI_{T_{MOD7}}$ )  
644 perform similarly as the luteolysis itself ( $TI_L$ ).

645

## HEAT DETECTION ATTENTIONS AND THE LH SURGE

646 Adriaens, Figure 1

647

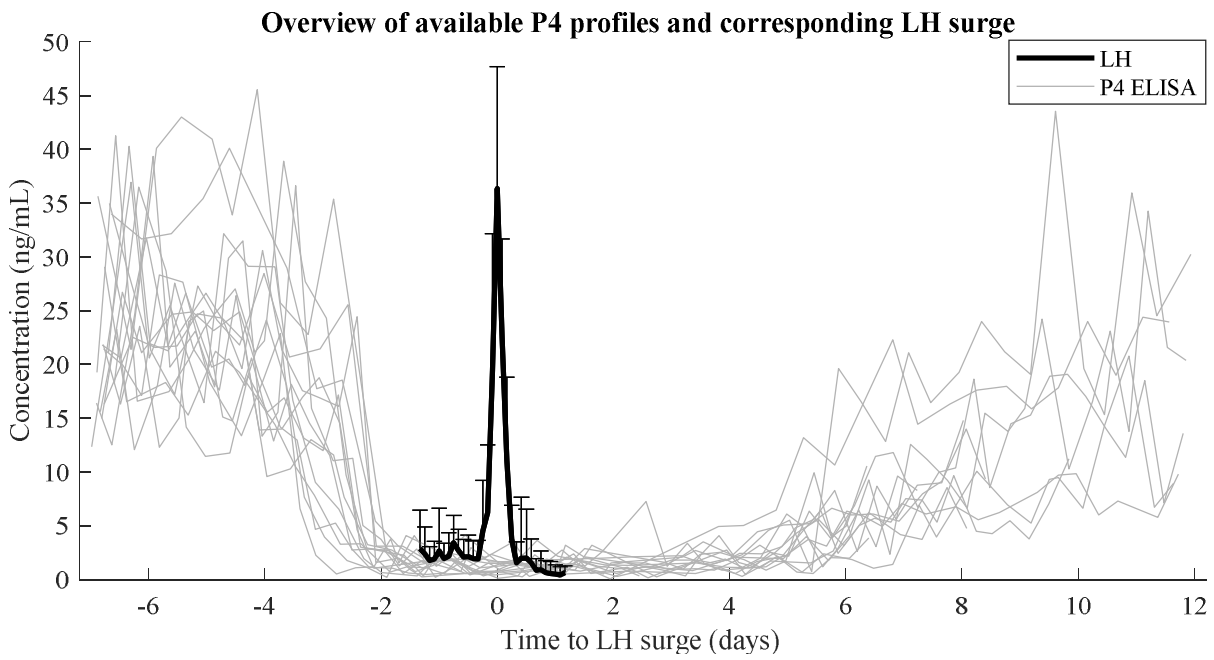

## HEAT DETECTION ATTENTIONS AND THE LH SURGE

648 Adriaens, Figure 2

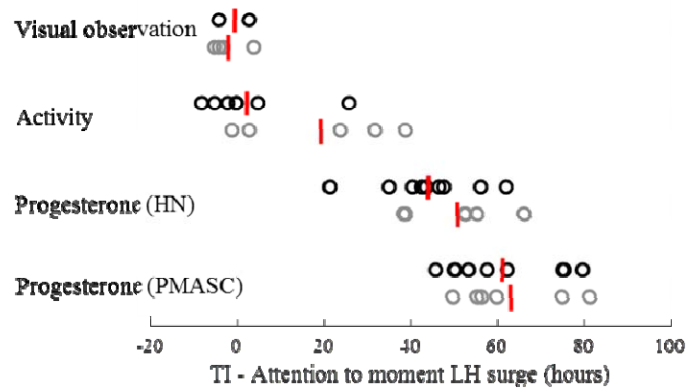

649



## HEAT DETECTION ATTENTIONS AND THE LH SURGE

650 Adriaens, Figure 3

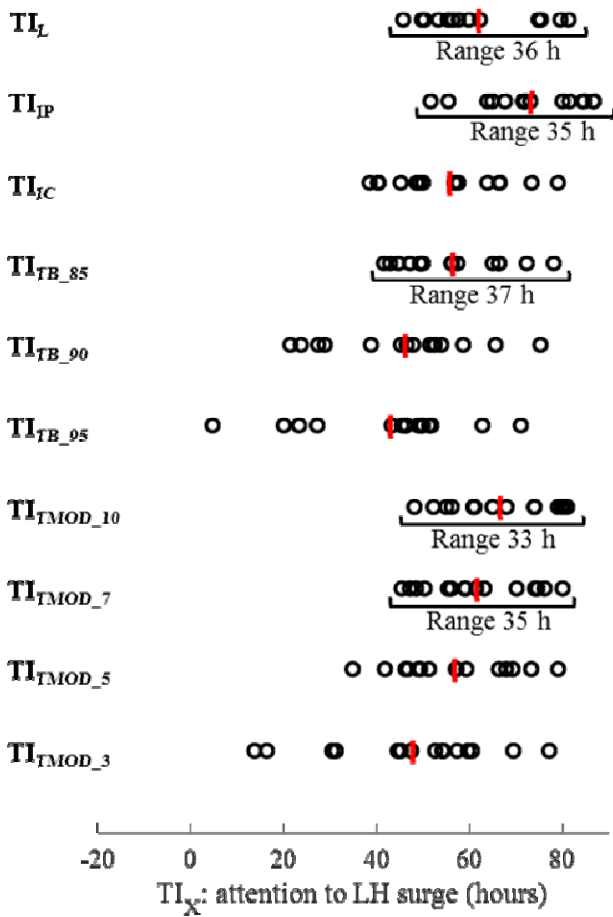

651
